# Supplementary material for: Use of touch screen tablets to support social connections and reduce responsive behaviours among people with dementia in care settings: a scoping review protocol
Source: PubMed Central journal article supplement — BMJ Open. 2019 Nov 19;9(11):e031653. doi: 10.1136/bmjopen-2019-031653 (PMC6886971; doi:10.1136/bmjopen-2019-031653), 2019-11-19
Supplement: bmjopen-2019-031653supp002.pdf [file bmjopen-2019-031653supp002.pdf]

## Supplementary file 2 – Literature search

## The 3-step approach

Step 1: The initial search included two online databases relevant to the topic: MEDLINE & AgeLine.

e.g., Search in MEDLINE

| #  | Searches                                                                               | Results |
|----|----------------------------------------------------------------------------------------|---------|
| S1 | (touchscreen*) OR (iPad) OR (tablet*) OR (mobile technology) OR (assistive technology) | 62640   |
| S2 | (MH Dementia* OR Alzheimer)                                                            | 120924  |
| S3 | Behav* OR Agitat*                                                                      | 1643776 |
| S4 | Social connection OR Quality of Life OR Psychosocial                                   | 398392  |
| S6 | S1 AND S2 AND S3                                                                       | 55      |
| S7 | S1 AND S2 AND S4                                                                       | 18      |

This initial search is then followed by an analysis of the text words contained in the title and abstract of retrieved papers, and of the index terms used to describe the articles.

Step 2: A second search using all identified keywords and index terms will then be undertaken across all selected databases: MEDLINE, AgeLine, Cumulative Index to Nursing and Allied Health, Cochrane, PsycINFO, and IEEE.

## Search terms and their combinations in step 2

| Touchscreen terms                                                                                   | Impact terms related to social connection                           | Impact terms related to behaviours                                      |
|-----------------------------------------------------------------------------------------------------|---------------------------------------------------------------------|-------------------------------------------------------------------------|
| Touchscreen*<br>iPad<br>Android<br>Assistive technology<br>Mobile technology<br>Mobile Applications | Psychological wellbeing<br>Quality of life<br>Emotion<br>Caregiving | Behav*<br>Agitat*<br>Behavioural and psychological symptoms of dementia |

Google will be used to search grey literature (i.e., organizational reports, newsletters, and other articles not indexed in a library database. For the Google search, we will perform phrase using the following terms

- (touchscreen OR ipad OR tablet) (dementia OR Alzheimer's)
- “assistive technology” “mobile technology” dementia Alzheimer's

Step 3: The resulting reference list of all identified reports and articles will be searched for additional studies. Google Scholar will be used to find published articles, organizational reports and related articles.
